# Supplementary material for: Dual proximity ligation mediated chain extension and displacement assisted signal cycles for sensitive and accurate methicillin-resistant Staphylococcus aureus (MRSA) detection
Source: Royal Society of Chemistry journal article supplement (doi:10.1039/d5an00001g), 2025-01-01
Supplement: d5an00001g1.pdf [file d5an00001g1.pdf]

## Supporting information

**Table S1.** The oligonucleotide sequences used in this work.

| <b>Title</b> | <b>Sequences (5' to 3')</b>                                                                          |
|--------------|------------------------------------------------------------------------------------------------------|
| P1           | Protein A antibody-TTT TTT TTT TTT TTT GTG AGG TTC GTG TGA TG                                        |
| P2           | GCG TGT ATC CCA TGT GTC CCT CAC TGA GTT TTT TTT TT-PBP2a antibody                                    |
| HP           | CAT CAC ACG GAC ACA TGG GAT ACA CGC CCA TCG TGT ACG CGT GTA TCC CAT GTG TCA CTT TTA CTA TAC AA       |
| PER probe    | TTA GGGm CmCC GGT TTT CCGm GmGC CCT AAC CCT AAC C CC TCA GCA GTA ACT ATA CAA AAA GTA ATT GTA TAG TAA |

### Supplemented experimental details:

*Assembly of the probes:* Before the experiments, s1 sequence and s2 sequence were mixed in TE buffer, annealed for 5 min at 95 °C, and cooled down to 25 °C to form assembly probes for sensing.
